# Supplementary material
Source: publisher figshare collection journal article supplement (https://frontiersin.figshare.com/ndownloader/files/26399932)
Supplement: Supplementary file [file 26399932]

## Supplementary Data

### Material and methods

#### Generation and culture of canonical and non-canonical Wnt stimulated cholangiocyte organoids from bile and tissue

For the initiation (of culture) of bile cholangiocyte organoids in canonical-Wnt stimulating conditions (cBCOs, n=6), we used a protocol similar to the one previously published by Soroka *et al.*<sup>1</sup>. In short, organoids were initiated from a maximum of three mL of bile collected *ex vivo* and from one millilitre of bile collected *in vivo*. Bile was washed twice for five minutes with cold Advanced (Adv)DMEM/F12 (supplemented with 1% penicillin/streptomycin, Life Technologies; 1% Hepes 1 M, Fisher Scientific; 1% Ultra-glutamine 200mM, Fisher Scientific and 0.2% Primocin, Invivogen) at 453g and suspended in 8 mL of cold AdvDMEM/F12. Subsequently, the supernatant was removed and the pellet was suspended in 3 mL of AdvDMEM/F12 and passed through a 100 µm cell strainer to remove debris. After a third wash, the pellet was collected and plated out in a hydrogel (Matrigel, Corning, or diluted Basement Membrane Extract, BME, Cultrex). Medium was added according to the previously described protocol.<sup>2,3</sup> The first three days the medium was supplemented with 1% anti-anti (Gibco) to prevent bacterial- or fungal infections.

Tissue-derived intrahepatic cholangiocyte organoids in canonical-Wnt stimulating conditions (cICOs, n=3) and extrahepatic cholangiocyte organoids in canonical-Wnt stimulating conditions (cECOs, n=3) were initiated and cultured as previously published.<sup>2-4</sup> In short, liver or extrahepatic bile duct biopsies (0.5-1.0 cm) were digested using a collagenase solution in (2.5 mg/ml collagenase A1, Roche) EBBS (Hyclone, ThermoFisher) for 30 min at 37 °C. Digestion was stopped by adding cold supplement AdvDMEM/F12 filtered through a 70 µm cell strainer. The cell suspension was spun down for 5 minutes, 4°C at 453g. Pellet was harvested in a hydrogel and specific medium was added according to protocol.<sup>2,3</sup> Medium was changed twice a week and organoids were passaged in a 1:2 to 1:8 ratio according to growth. Cultures were negative for mycoplasma contamination (data not shown).

The ncECO cultures (n=6) were initiated and maintained as previously published.<sup>5</sup> In short, cells were scraped from the inside of the gallbladders or from the inside of an extrahepatic bile duct (n=1) and collected in cold William's-E Medium (WE). The cells were centrifuged at 453g for 5 minutes at 4°C, subsequently supernatant was removed, and the cell pellet was washed twice with excess cold WE. Next the pellet was collected and plated out in either matrigel or 70% BME diluted with WE and medium was added according to the standard protocol.<sup>5</sup>

Additionally, to investigate the influence of culture conditions on BCOs. Bile cholangiocyte organoids were either created from the same bile samples (n=3) either under cBCO conditions or ncBCO conditions. After three passages a switch from cBCO towards ncBCO conditions and from ncBCO conditions towards cBCO conditions was performed. Two passages later RNA was harvested from these 4 conditions per donor sample and analysed by qRT-PCR.

#### Ussing Chamber Measurement conditions

The temperature of the chambers was kept 37 °C by warm water bath circulation. Each chamber consisted of 3 mL modified Meyler solution (128 mmol/liter NaCl, 4.7 mmol/liter KCl, 1.3 mmol/liter CaCl<sub>2</sub>, 1.0 mmol/liter MgCl<sub>2</sub>, 0.3 mmol/liter Na<sub>2</sub>HPO<sub>4</sub>, 0.4 mmol/liter NaH<sub>2</sub>PO<sub>4</sub>, 20 mmol/liter NaHCO<sub>3</sub>, 10 mmol/liter HEPES, supplemented with glucose (10 mmol/liter) in 95% O<sub>2</sub>, 5% CO<sub>2</sub> at pH 7.3). Current was clamped and every second current was recorded. Two voltage spikes (5 millivoltage) were given, to measure resistance along the epithelial layers ( $V=I \cdot R$ ; *TEER*). CFTR-dependent anion secretion was activated by adding 20 µM Secretin (Sigma) basolateral or 10 µM Forskolin (Sigma) to

both sides of the cells and inhibited by addition of GlyH-101 (20  $\mu$ M, apical side, Calbiochem) or 100  $\mu$ M Somatostatin (Sigma) basolateral. Calcium ( $\text{Ca}^{2+}$ ) depended chloride ( $\text{Cl}^-$ ) channels (CaCC) were stimulated by UTP (50  $\mu$ M, apical side, Sigma) and inhibited by T16Ainh-A01 (50  $\mu$ M, apical side, Tocris).

## Tables

**Table S1. Donor and culture characteristics of organoids included.**

| Age patient (years) | Gender | Cells Source        | Donor Type or Indication ERCP/surgery | Culture type                    | Successful Culture | Characterized at Passage # | Gene-expression by qRT-PCR |
|---------------------|--------|---------------------|---------------------------------------|---------------------------------|--------------------|----------------------------|----------------------------|
| 13                  | M      | GB, GBB             | DBD                                   | ncECO 1, ncBCO 1                | +                  | 5-9                        | +                          |
| 26                  | M      | GBB                 | DCD                                   | ncBCO 7**, cBCO 7**             | +                  | 5                          | +                          |
| 29                  | M      | ERCP                | Bile stones                           | ncBCO 14                        | +                  | ND                         | -                          |
| 30                  | M      | ERCP                | PSC                                   | ncBCO 8 cBCO 8                  | +                  | 5                          | +                          |
| 35                  | F      | GBB, GB             | DBD                                   | ncBCO 5, ncECO 5                | +                  | 5                          | +                          |
| 41                  | F      | EHBD                | PSC                                   | ncECO 11                        | +                  | 5                          | +                          |
| 47                  | M      | GBB                 | DCD                                   | ncBCO 6**, cBCO 6**             | +                  | 5                          | +                          |
| 50                  | M      | GB                  | Bile stones                           | ncECO 12                        | +                  | 5-8                        | +                          |
| 51                  | F      | ERCP                | AS                                    | ncBCO 15                        | +                  | ND                         | -                          |
| 52                  | M      | GBB, GB             | DCD                                   | ncBCO 4, ncECO 4                | +                  | 5-9                        | +                          |
| 54                  | M      | EHBD                | DBD                                   | cECO D*                         | +                  | 5                          | -                          |
| 54                  | F      | ERCP                | Papiladenoma                          | ncBCO 10                        | +                  | 5-8                        | +                          |
| 56                  | F      | EHBD                | DCD                                   | cECO C*                         | +                  | 5                          | -                          |
| 57                  | M      | Liver, GBB, GBB     | DCD                                   | cICO 2, cBCO 2, ncBCO 2         | +                  | 5<br>5<br>5                | +(only cBCO)               |
| 58                  | F      | ERCP                | AS                                    | ncBCO 16                        | +                  | ND                         | -                          |
| 59                  | M      | GB, GBB, GBB, Liver | DBD                                   | ncECO 3, cBCO 3, ncBCO 3 cICO 3 | +                  | 5-8<br>5<br>5<br>5         | +                          |
| 67                  | M      | Liver               | DCD                                   | cICO 13                         | +                  | 5                          | +                          |
| 67                  | F      | EHBD                | Cryptogenic Cirrhosis                 | cECO F*                         | +                  | 5                          | -                          |
| 70                  | M      | ERCP                | Bile stones                           | ncBCO 17                        | +                  | ND                         | -                          |
| 72                  | M      | ERCP                | Bile stones                           | ncBCO 18                        | +                  | ND                         | -                          |
| 73                  | F      | ERCP                | AS                                    | ncBCO 19                        | -                  | ND                         | -                          |
| 75                  | F      | GBB                 | DBD                                   | ncBCO 9**, cBCO 9**             | +                  | 5                          | +                          |

**Abbreviations:** AS: Anastomotic bile duct Stricture, ncBCO: Bile Cholangiocyte Organoid in non-canonical Wnt stimulating conditions, EHBD: Extrahepatic Bile Duct, cECOs: extrahepatic cholangiocyte organoids in canonical Wnt stimulating conditions, cICOs: intrahepatic cholangiocyte

organoids in canonical Wnt stimulating conditions, cBCO: Bile Cholangiocyte Organoids organoids in canonical Wnt stimulating conditions, DBD: Donation after Brainstem Death, DCD: Donation after Circulatory Death, ncECO: Extrahepatic Cholangiocyte Organoids in non-canonical Wnt stimulating conditions, ERCP: Endoscopic Retrograde Cholangiopancreatography, F: Female, GB: Gallbladder, GBB: Gallbladder Bile, M: Male, PSC: Primary Sclerosing Cholangitis, ND: Not Determined. \*These organoid cultures were only analysed for Micro Array analysis. \*\*Used for switching experiment (ncBCOs, are only used for the switching experiment).

**Table S2. List of genes and primers used.**

| Gene   | Primer sequence (5' à 3')                                 | Gene    | Primer sequence (5' à 3')                              |
|--------|-----------------------------------------------------------|---------|--------------------------------------------------------|
| KRT7   | F GGGGACGACCTCCGGAATAC<br>R CTTGGCAGCTGTTCTTGA            | IGFBP3  | F CAAGGGGAAGGAGGACGTGCA<br>R GCTGCTGGTCATGTCCTTGCC     |
| KRT19  | F GCACTACAGCCACTACTACACGA<br>R CTCATGCGCAGAGCCTGTT        | KLK7    | F ACCACCTGTACTGTCTCCGGCT<br>R AACCTTCGTGCAGTCCTGGGG    |
| HNF1β  | F TCACAGATACCAGCAGCATCAGT<br>R GGGCATCACCAGGCTTGTA        | IGFBP1  | F AGGCACAGGAGACATCAGGAGA<br>R CACCAGCAGAGTCCCGCCTC     |
| HPRT   | F GCTATAAATTCTTTGCTGACCTGCG<br>R CTTCTGTTGGGTCCTTTTCACC   | SLC2a3  | F ATTGCTCTTCCCTCCGCTGC<br>R CCTCAAAAGTCCTGCCACGGGT     |
| ALB    | F CTGCCTGCCTGTTGCCAAAGC<br>R GGCAAGGTCCGCCCTGTCATC        | TFF1    | F ACAAGCTGCTGTACACGGACA<br>R AAGTTTCCAGGGCCGGGCAAT     |
| GAPDH  | F CTTTTGCGTCGCCAGCCGAG<br>R CCAGGCGCCCAATACGACCA          | TFF2    | F TCTGTCCTGCCTCCCTGATCCA<br>R CTCTGGCAGCTGAATCCCGGT    |
| HNF4α  | F GTACTCCTGCAGATTAGCC<br>R CTGTCCTCATAGCTTGACCT           | GC      | F ATGGCCAAAGAGCTGCCTGA<br>R TGGGCAGCTGGCATGAAGTA       |
| AQP1   | F GGCCAGCGAGTTCAAGAAGAA<br>R TCACACCATCAGCCAGGTCAT        | A1AT    | F TGAGGAGAGCAGGAAAGGACA<br>R CTCAGCCAGGGAGACAGG        |
| NKCC1  | F ACCAAGGATGTGGTAGTAAGTGTGG<br>R GGATTCTTTTTCAACAGTGGTTGA | ALDH1A  | F TGAAGTCATCGGTGGCTTGA<br>R ACCCTACGATGACACTTGTGCC     |
| GGT    | F TGGTGGACATCATAGGTGGGGA<br>R ATGACGGCAGCACCTCACTT        | LYZ     | F GGCAAAACCCAGGAGCAGTT<br>R TGCCACCCATGCTCTAATGCCT     |
| ASBT   | F GGTGGCCTTTGACATCCTCCC<br>R GCATCATTCGAGGGCAAGC          | AGR2    | F TCCTAGCCGCCGACTCACACA<br>R GGTTTGACTGTGGTATCTCTGGCCA |
| SOX9   | F ACCAGTACCCGCACTTGAC<br>R GCGCCTGAAGATGGCGTTG            | S100A6  | F GGCAGGGAGGGTGACAAGCA<br>R CCTCCTGGTCCTTGTTCGGT       |
| EpCAM  | F GACTTTTGCCGCAGCTCAGGA<br>R AGCAGTTTACGGCCAGCTTGT        | TACSTD2 | F CGAGCTTGAGGTACCCGGCG<br>R TGCGCCGAGGAATCAGGAAGC      |
| CFTR   | F TGGCGGTCACTCGGCAATTT<br>R TCCAGCAACCGCCAACAACT          | LCN2    | F ACCACATCGTCTTCCCTGTCCC<br>R TGGCACTGTGGGGAGGGTCTC    |
| LGR5   | F GTCAGCTGCTCCCGAATCCC<br>R TGAAACAGCTTGGGGGCACA          | KRT18   | F TCCAAAAGACCACCACCCGCC<br>R TGCTCCCCAAAGTGATCCCTGC    |
| Cyp3A4 | F AGCAAAGAGCAACACAGAGCTGAA<br>R CAGAGGTGTGGGCCCTGGAAT     | CES1    | F GCCCGGAACCACAGAGATGCT<br>R AGCTCATCCCCGTGGTCTCCT     |
| LOLX4  | F CTGGGCCGGACTGACTTTCGT<br>R CTTGTGCCCCTCAGCCACCTT        | CD133   | F CCTGGGGCTGCTGTTTATTA<br>R ATCACCAACAGGGAGATTGC       |
| MMP1   | F GGCCCAAAACCCAAAAGCG<br>R CGGGTAGAAGGGATTTGTGCGC         | LGR5    | F GTCAGCTGCTCCCGAATCCC<br>R TGAAACAGCTTGGGGGCACA       |
| AGR2   | F TCCTAGCCGCCGACTCACACA<br>R GGTTTGACTGTGGTATCTCTGGCCA    |         |                                                        |
| CTSE   | F ATTGGCTCCCCACCACAGAA<br>R CTGGACTGGGAAGGCTGGAA          |         |                                                        |

**Table S3. Overview of cholangiocyte organoids cultured in this manuscript.**

| <b>Name</b>                                                                     | <b>Abbreviation</b> | <b>Source</b>                                                              | <b>Culturing conditions</b> | <b>Protocol/reference</b>                                                 |
|---------------------------------------------------------------------------------|---------------------|----------------------------------------------------------------------------|-----------------------------|---------------------------------------------------------------------------|
| Bile Cholangiocyte Organoid in canonical Wnt stimulating conditions             | cBCO                | Bile                                                                       | Canonical Wnt               | Soroka <i>et al.</i> <sup>1</sup>                                         |
| Intrahepatic Cholangiocyte Organoid in canonical Wnt stimulating conditions     | cICOs               | Intrahepatic cholangiocytes obtained via a liver biopsy                    | Canonical Wnt               | Huch <i>et al.</i> <sup>2</sup> ; Broutier <i>et al.</i> <sup>3</sup>     |
| Extrahepatic Cholangiocyte Organoid in canonical Wnt stimulating conditions     | cECOs               | Extrahepatic cholangiocytes obtained from an extrahepatic bile duct biopsy | Canonical Wnt               | Rimland <i>et al.</i> <sup>4</sup>                                        |
| Extrahepatic Cholangiocyte Organoid in non-canonical Wnt stimulating conditions | ncECO               | Extrahepatic cholangiocytes                                                | Non-canonical Wnt           | Sampaziotis <i>et al.</i> <sup>5</sup> ; Tysoe <i>et al.</i> <sup>6</sup> |
| Bile Cholangiocyte Organoid in non-canonical Wnt stimulating conditions         | ncBCO               | Bile                                                                       | Non-canonical Wnt           | This protocol                                                             |

Figures

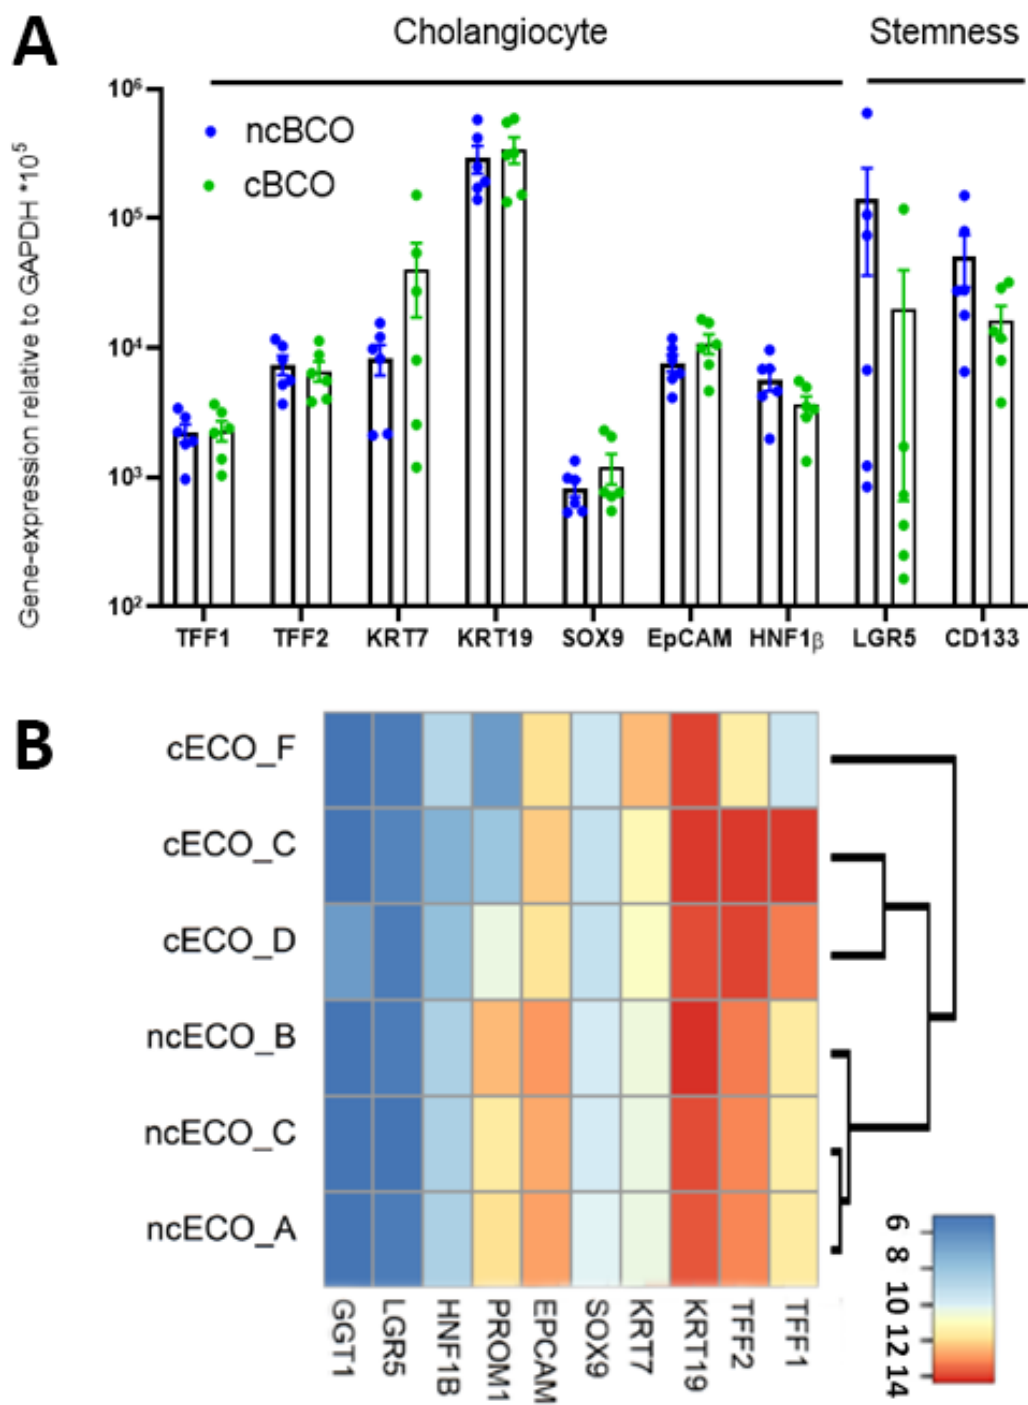

**Supplementary Figure 1. Classical cholangiocyte markers are similar expressed between non-canonical Wnt and canonical-Wnt stimulating conditions.**

**(a)** qRT-PCR showing comparison between ncBCOs (n=6) and cBCOs (n=6) for different cholangiocyte- and stemness/Wnt-target related genes, relative to the housekeeping gene *GAPDH*, error bars are presented with standard error of the mean. **(b)** Gene-expression as analysed by Micro Array for ncECOs (n=3) and cECOs (n=3) for the similar genes as displayed in panel **a**. Color key represents the log2 transformed signal intensities after variance stabilizing normalization.

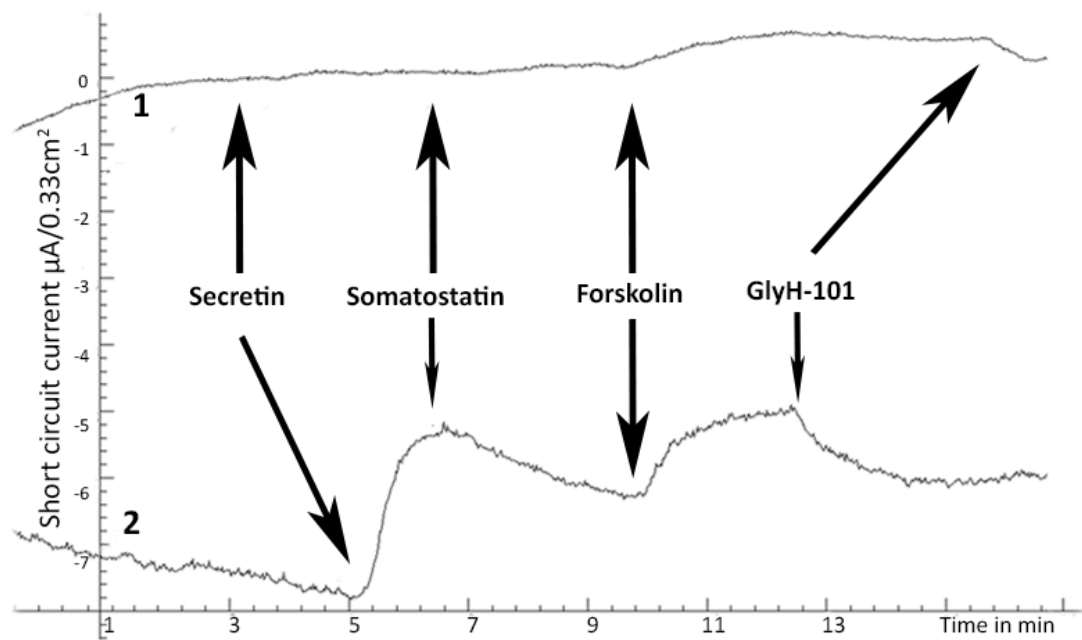

**Supplementary Figure 2. Cholangiocyte related and ion-channel and basolateral receptor activity in ncECOs and cICOs.**

Representative ion-channel functionality of 2D-grown tissue derived canonical-Wnt stimulated organoids (cICOs, line 1) and tissue derived non-canonical Wnt stimulated organoids (ncECOs, line 2) in an Ussing-chamber. Stimulation with cAMP-activator(forskolin), resulted in an increase in short circuit current, however secretin stimulation (to the basolateral side) only gave a response in the ncECOs. In similar fashion, somatostatin (basolateral addition) only give a response in ncECOs and not in cICOs, while Cystic Fibrosis Transmembrane conductance Regulator (CFTR)-inhibitor, GlyH-101 (luminal addition), resulted in an inhibition of the channel in both organoid-types. Indicating the presence of functional CFTR channels in both organoids, but only somatostatin and secretin-receptors are functional in ncECOs. Moreover, the CFTR responses in ncECOs seems more pronounced compared to cICOs.



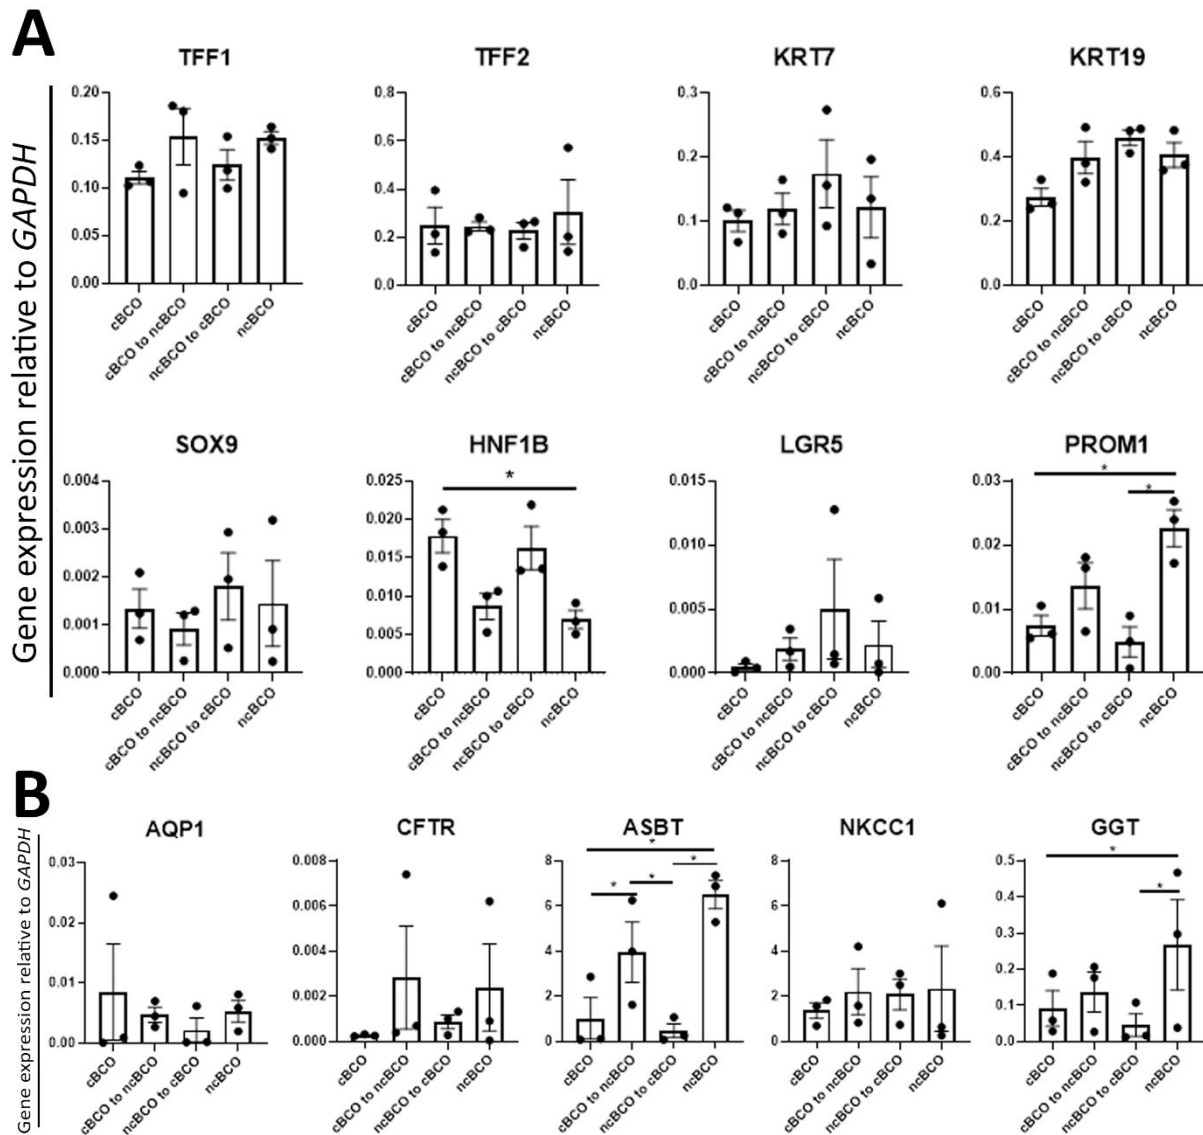

**Supplementary Figure 3. Gene-expression profiles of bile cholangiocyte organoids under different culture conditions.**

**(a)** Gene-expression profiles as analysed by qRT-PCR for BCOs started up in either canonical Wnt (cBCOs) or non-canonical Wnt culture (ncBCOs) conditions for the classical cholangiocyte and stem cell/Wnt-target genes. After three passages pallet was split in half and organoids were either continued in their original conditions or switch to the other (n=3, all conditions). Error bars indicate standard error of the mean. **(b)** Gene-expression profiles of the cholangiocyte markers related to function as analysed by qRT-PCR for the same samples as displayed in panel a. Error bars indicate standard error of the mean. \*is considered a significant difference ( $p < 0.05$ ).

## Supplementary references

1. Soroka CJ, Assis DN, Alrabadi LS, *et al.* Bile-Derived Organoids From Patients With Primary Sclerosing Cholangitis Recapitulate Their Inflammatory Immune Profile. *Hepatology*. 2019 Sep;70(3):871-882.
2. Huch M, Gehart H, van Boxtel R, *et al.* Long-Term Culture of Genome-Stable Bipotent Stem Cells from Adult Human Liver. *Cell*. 2015 Jan 15; 160(1-2): 299–312.
3. Broutier L, Andersson-Rolf A, Hindley CJ, *et al.* Culture and establishment of self-renewing human and mouse adult liver and pancreas 3D organoids and their genetic manipulation. *Nat Protoc*. 2016 Sep;11(9):1724-43.
4. Rimland CA, Tilson SG, Morell CM, *et al.* Regional differences in human biliary tissues and corresponding in vitro derived organoids. Epub ahead of print 29 March 2020.
5. Sampaziotis F, Justin AW, Tysoe OC, *et al.* Reconstruction of the mouse extrahepatic biliary tree using primary human extrahepatic cholangiocyte organoids. *Nat Med*. 2017 Aug;23(8):954-963.
6. Tysoe OC, Justin AW, Brevini T, *et al.* Isolation and propagation of primary human cholangiocyte organoids for the generation of bioengineered biliary tissue. *Nat Protoc*. 2019 Jun;14(6):1884-1925.
